# Supplementary material for: Cardiac arrhythmias and conduction abnormalities in patients with type 2 diabetes
Source: PubMed Central journal article supplement (PMC9867726; doi:10.1038/s41598-023-27941-5), 2023-01-21
Supplement: 41598_2023_27941_MOESM1_ESM.pdf [file 41598_2023_27941_MOESM1_ESM.pdf]

**Cardiac Arrhythmias and Conduction Abnormalities in  
Type 2 Diabetes**

**Supplemental material**

## Supplementary discussion of the statistical methods

This is a brief discussion regarding the statistical models used in this study. For this study, we calculated crude- and standardized incidence rates for outcomes, among patients with diabetes and controls. In addition, we applied Cox proportional hazards model excess risk between the first- and last time periods, in first- and last time periods. Additionally, Cox regression was used to assess the relative risk associated with the number of risk factors at target for patients with diabetes, compared to matched controls, and to assess optimal levels for five selected risk factors, by applying a prediction function to our regression models.

### Incidence rates and change in risk over time

For the standardized incidence rates, we used Swedish population life tables, from the initial time period as the reference population for the type 2 diabetes case control cohort. We constructed the following age-categories, **1. < 45, 2. 45–54, 3. 55–64, 4. 65–74 and 5. > 75** years of age, for the reference population and our study cohort. The reference population was also stratified on gender.

The following Cox regression model was used separately for both the first and last time periods:

**Table 2: <sup>a</sup> First- and last time period (example)**

$$\lambda(\text{survtime}_{\text{atrial fibrillation \& flutter}}, \text{event}_{\text{atrial fibrillation \& flutter}}) \\ = \exp(\beta_1 \text{category}_{j1}) + \beta_2 \text{age}_{j2} + \beta_3 \text{sex}_{j3} + \beta_3 \text{ethnicity}_{j3} + \beta_4 \text{marital status}_{j4} \\ + \beta_5 \text{income\_quartiles}_{j5} + \beta_6 \text{education}_{j6}$$

**Table 2: <sup>b</sup> Diabetes vs controls (first- vs last time period)**

$$\lambda(\text{survtime}_{\text{atrial fibrillation \& flutter}}, \text{event}_{\text{atrial fibrillation \& flutter}}) \\ = \beta_1 \text{category}_{j1} + \beta_2 \text{age}_{j2} + \beta_3 \text{sex}_{j3} + \beta_4 \text{timeperiod}_{j4} \\ + \exp(\beta_5 \text{category} * \text{timeperiod})_{j5} + \beta_6 (\text{category} * \text{age})_{j6} \\ + \beta_7 (\text{category} * \text{sex})_{j7}$$

**Table 2: <sup>c</sup> 10-year hazard ratio**

$$\lambda(\text{survtime}_{\text{atrial fibrillation \& flutter}}, \text{event}_{\text{atrial fibrillation \& flutter}}) \\ = \exp(\beta_1 \text{timeperiod}_{j1}) + \beta_2 \text{age}_{j2} + \beta_3 \text{sex}_{j3} + \beta_3 \text{ethnicity}_{j3} \\ + \beta_4 \text{marital status}_{j4} + \beta_5 \text{income\_quartiles}_{j5} + \beta_6 \text{education}_{j6}$$

The variable *category* denotes either patients with diabetes or matched control. Time-period indicated either first- or last time period, however, in the final model, time period was modeled as a linear term. The coefficient for this variables shows the average relative risk reduction for a 2-year interval, therefore exponentiating this coefficient with 5 results in the average 10-year change in hazard ratio.

### Multifactorial risk factor control

We constructed a Cox regression model that includes number of risk factors at target ranging from 0 to 5 (referred to as  $\beta_1(\text{category})$ ), modeled as categorical variables. For this variable,

we included traditional and modifiable cardiometabolic risk factors such as, glycated hemoglobin, systolic- and diastolic blood pressure, low-density lipoprotein cholesterol, smoking and renal function (albuminuria).

In order to achieve even greater statistical power in these analyses, we decided to categorize the  $\beta_1(\text{category})$  variable even further, ranging between 2–3 categories in the final models. Matched controls had a duration of diabetes set to zero years and were also considered the reference *group* for the  $\beta_1(\text{category})$  variable, whereas patients with diabetes had their duration of diabetes subtracted with the grand mean of the respective diabetes cohorts.

All Cox models are adjusted for age, sex, socioeconomic variables, baseline comorbidities and treatment with either antihypertensives, statins, antithrombotic- or anticoagulant medication. An example of the Cox model for the analysis of number of risk factor at target is depicted below.

**Figure 4: Example of Cox model for atrial fibrillation and atrial flutter**

$$\begin{aligned} \lambda(\text{survtime}_{\text{atrial fibrillation \& flutter}}, \text{event}_{\text{atrial fibrillation \& flutter}}) \\ = \exp(\beta_1 \text{category}_{j1}) + \beta_2 \text{diabetesduration}_{j2} + \text{strata}(\beta_3 \text{sex}_{j3}) \\ + \beta_4 \text{income\_quartiles}_{j4} + \beta_5 \text{education}_{j5} + \beta_6 \text{maritalstatus}_{j6} + \beta_7 \text{ethnicity}_{j7} \\ + \beta_8 \text{pre\_chd}_{j8} + \beta_9 \text{pre\_heartfailure}_{j9} + \beta_{10} \text{pre\_atrialfibrillation}_{j10} \\ + \beta_{11} \text{pre\_stroke}_{j11} + \beta_{12} \text{pre\_copd}_{j12} + \beta_{13} \text{pre\_dementia}_{j13} \\ + \beta_{14} \text{pre\_hypertension}_{j14} + \beta_{15} \text{pre\_renal}_{j15} + \beta_{16} \text{pre\_cancer}_{j16} \\ + \beta_{17} \text{antihypertensives}_{j17} + \beta_{18} \text{statins}_{j18} + \beta_{19} \text{antithrombotic}_{j19} \\ + \beta_{20} \text{antitcoagulants}_{j20} + \beta_{21} \text{age}_{j21} \end{aligned}$$

**Optimal levels for risk factors**

We used the general Cox model with restricted cubic splines to delineate the value that was associated with the lowest risk for each outcome. The guideline target level was set as reference level for each risk factor. For glycated hemoglobin we used 53 mmol/mol (7.0%), for systolic blood pressure 130 mmHg and for low-density lipoprotein cholesterol 2.5 mmol/L.

For continuous variables, we used restricted cubic splines with three evenly spaced knots and did experiment with additional splines and knots for all continuous predictors, however between 2 to 3 knots seemed optimal, 4 and more did not contribute especially much to the model.

*This model serves as an example of how our Cox models were constructed and glycated hemoglobin was predicted:*

**Figure 2: Example of Cox model for atrial fibrillation and atrial flutter (Type 2 Diabetes)**

$$\begin{aligned}
& \lambda(\text{survtime}_{\text{atrial fibrillation \& flutter}}, \text{event}_{\text{atrial fibrillation \& flutter}}) \\
& = \times \exp(\text{rcs}(\beta_1 \text{HbA1c}_{j1}, 3) + \text{strata}(\beta_2 \text{sex}_{j2}) + \text{rcs}(\beta_3 \text{BMI}_{j3}, 3) \\
& + \text{rcs}(\beta_4 \text{LDL} - C_{j4}, 3) + \text{rcs}(\beta_5 \text{HDL} - C_{j5}, 3) + \text{rcs}(\beta_6 \text{eGFR}_{j6}, \\
& 3) + \text{rcs}(\beta_7 \text{Age}_{j7}, 3) + \text{rcs}(\beta_8 \text{systolicBP}_{j8}, 3) + \text{rcs}(\beta_9 \text{diastolicDP}_{j9}, 3) \\
& + \beta_{10} \text{physical\_acitivity}_{j10} + \beta_{11} \text{pre\_chd}_{j11} + \beta_{12} \text{pre\_heartfailure}_{j12} \\
& + \beta_{13} \text{pre\_atrialfibrillation}_{j13} + \beta_{14} \text{income\_quartiles}_{j14} + \beta_{15} \text{education}_{j15} \\
& + \beta_{16} \text{ethnicity}_{j16} + \beta_{17} \text{statins}_{j17} + \beta_{18} \text{antihypertensives}_{j18} + \beta_{19} \text{smoking}_{j19} \\
& + \beta_{20} \text{antithrombotics}_{j20} + \beta_{21} \text{anticoagulants}_{j21} + \beta_{22} \text{pre\_stroke}_{j22} \\
& + \beta_{23} \text{pre\_hypertension}_{j23} + \beta_{24} \text{pre\_pad}_{j24} + \beta_{25} \text{pre\_copd}_{j25} \\
& + \beta_{26} \text{pre\_dementia}_{j26} + \beta_{27} \text{pre\_renal}_{j27} + \beta_{28} \text{pre\_cancer}_{j28} \\
& + \text{rcs}(\beta_{29} \text{diabetesduration}_{j29}, 3)
\end{aligned}$$

In Figure 3, we have used a similar regression model to estimate risk associated with age at baseline and duration of diabetes.

### Excess risk for cardiac arrhythmias

We constructed Cox regression models to estimate excess risk for arrhythmias, in the entire diabetes cohorts, compared to their matched controls. As seen in Figure 5 in main manuscript, we included the following variables:

#### **Figure 5: Example of atrial fibrillation and atrial flutter**

$$\begin{aligned}
& \lambda(\text{survtime}_{\text{atrial fibrillation \& flutter}}, \text{event}_{\text{atrial fibrillation \& flutter}}) \\
& = \exp(\beta_1 \text{category}_{j1}) + \beta_2 \text{age}_{j2} + \beta_3 \text{sex}_{j3} + \beta_3 \text{ethnicity}_{j3} + \beta_4 \text{marital status}_{j4} \\
& + \beta_5 \text{income\_quartiles}_{j5} + \beta_6 \text{education}_{j6}
\end{aligned}$$

The variable *category* denotes either patients with diabetes or matched control

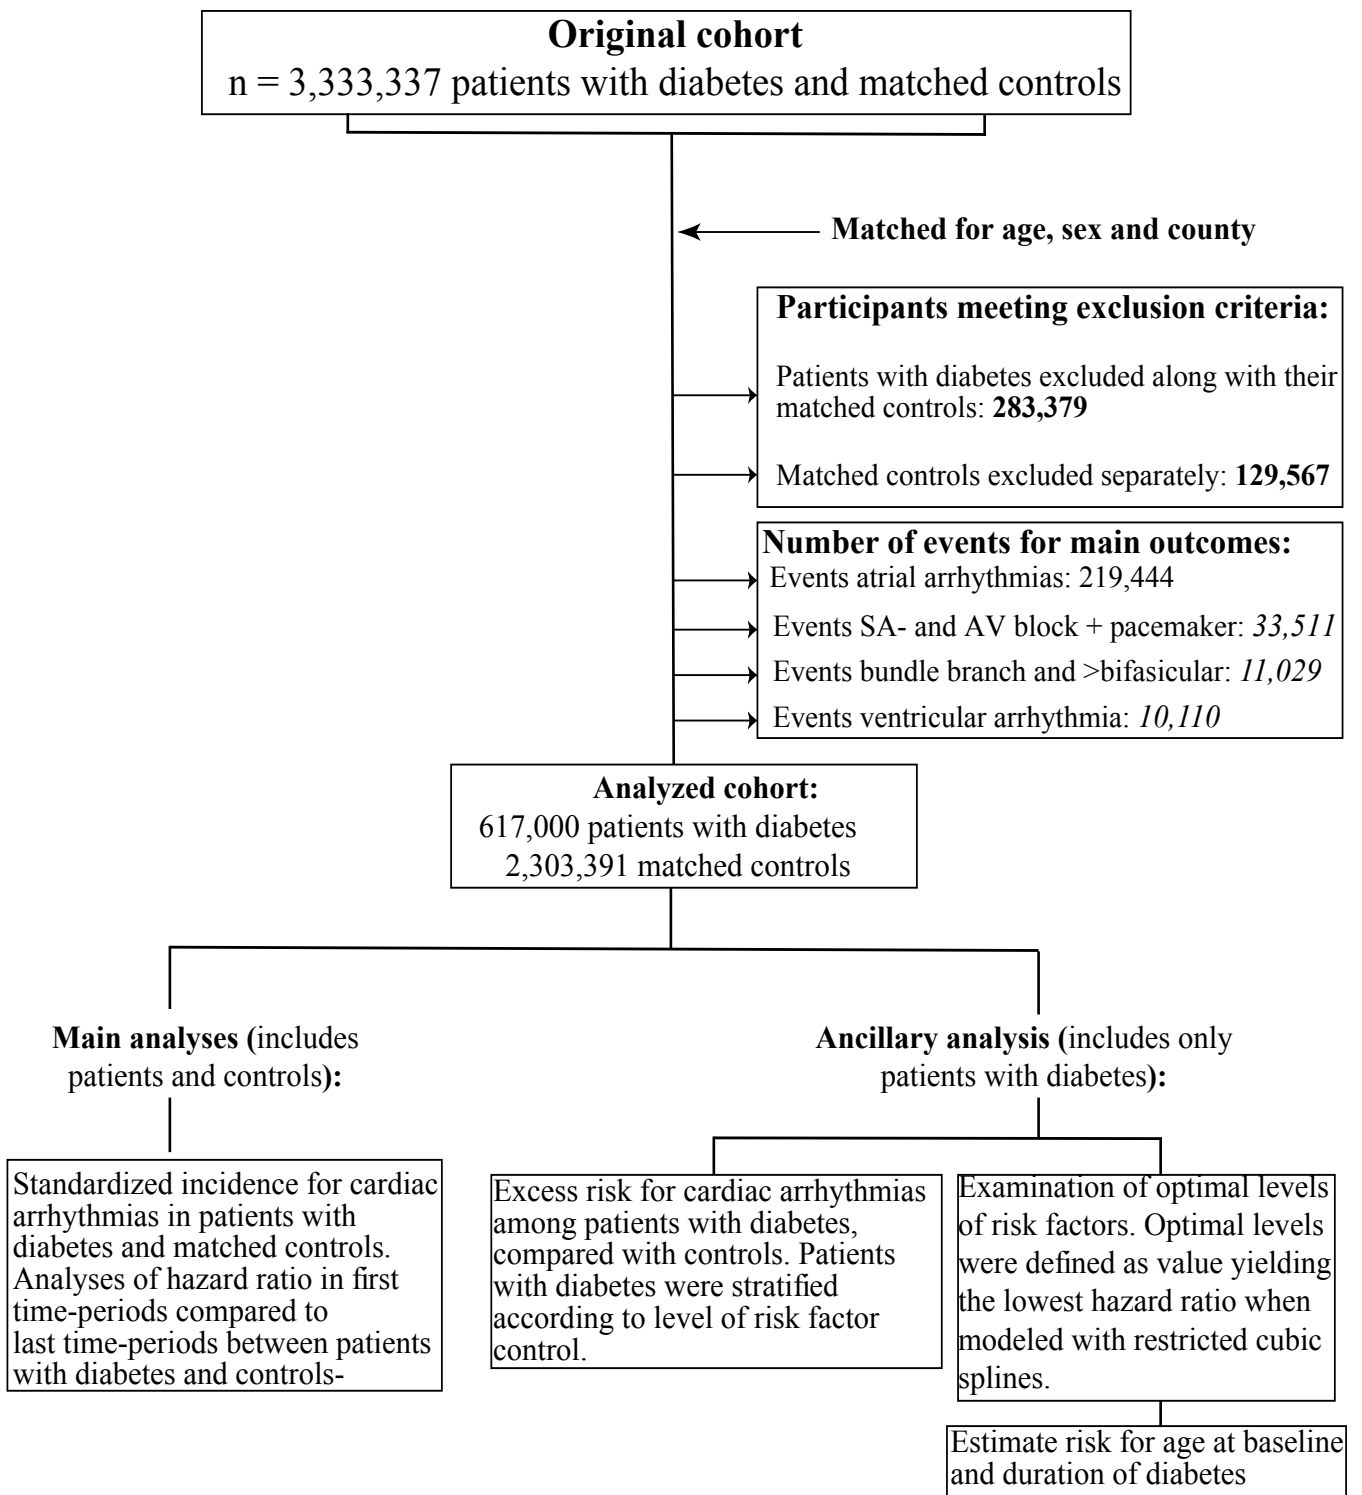

**Supplementary figure S1: Flow chart of study cohort and analyses performed.** Participants may fulfill more than one exclusion criteria

**Table S1. ICD-9 and ICD-10 Codes Used to Define Baseline Conditions and Outcomes**

| <b>Outcomes</b>                                                               | <b>ICD-9</b>                                                          | <b>ICD-10</b>                                                                                                                                                                                             |
|-------------------------------------------------------------------------------|-----------------------------------------------------------------------|-----------------------------------------------------------------------------------------------------------------------------------------------------------------------------------------------------------|
| <b>Cardiac arrhythmias</b>                                                    |                                                                       |                                                                                                                                                                                                           |
| Atrial fibrillation and atrial flutter                                        | I427D, I4273                                                          | I480, I481, I482, I483, I484, I489                                                                                                                                                                        |
| Sinus node disease, atrioventricular block and cardiac pacemaker implantation | I426A, I4260, V45A, V450                                              | I441, I442, I495, Z950                                                                                                                                                                                    |
| Intraventricular conduction blocks                                            | I426C, I426D, I4263, I426E, I4264, I426F, I426G, I426                 | I444, I445, I457, I450, I451, I452, I453                                                                                                                                                                  |
| Ventricular tachycardia and ventricular fibrillation                          | I427B, I4271, I427E, I4274,                                           | I490, I472                                                                                                                                                                                                |
| <b>Comorbidities</b>                                                          |                                                                       |                                                                                                                                                                                                           |
| Coronary heart disease                                                        | 410-414                                                               | I20-I25                                                                                                                                                                                                   |
| Stroke                                                                        | 431-434, 436                                                          | I61-I64                                                                                                                                                                                                   |
| Heart failure & cardiomyopathies                                              | 425, 421, 428                                                         | I50, I42                                                                                                                                                                                                  |
| Hypertension                                                                  | 401, 402, 403, 404, 405                                               | I109, I11, I120, I129, I132, I139, I130, I131, I159, I150, I152, I158                                                                                                                                     |
| Peripheral arterial disease                                                   | 440C, 443X                                                            | I702, I739                                                                                                                                                                                                |
| Dementia                                                                      | 294B                                                                  | F00, F01, F02, F039                                                                                                                                                                                       |
| End-stage renal disease                                                       | 5818, 584, 585, 583, 590, 586, 593X, 791X, V42A, 250D, 403, V45B, V56 | N179, N178, N170, N172, N189, N181, N182, N183, N184, N185, N199, Z940, DR016, N083, E112C, E112C, E112W, E112X, E102, E102X, E132, E242, E122, E112A, E112B, I120, Z992, DR013, DR023, DR056, Z941, Z492 |
| Cancer                                                                        |                                                                       | C00–C97                                                                                                                                                                                                   |
| COPD                                                                          | 496, 491                                                              | J44                                                                                                                                                                                                       |
| Alcoholism                                                                    | 291, 292, 303, 305A                                                   | F10                                                                                                                                                                                                       |

\* Includes ICD-codes as main diagnosis and up to 6 contributory causes for outcomes and comorbidities

**Table S2. Crude- and standardized incidence rates for atrial fibrillation/flutter and SA- AV node dysfunction and pacemaker implantation, in patients with type 2 diabetes and matched controls for all time-periods.**

| Crude rate                                        | Adjusted rate | Lower confidence interval | Upper confidence interval | Events | Person-years | Time-period | n        | Category |
|---------------------------------------------------|---------------|---------------------------|---------------------------|--------|--------------|-------------|----------|----------|
| <b>Atrial fibrillation and flutter</b>            |               |                           |                           |        |              |             |          |          |
| 1535,7                                            | 780,6         | 682,7                     | 922,2                     | 468    | 30474,4      | P1          | 88084    | Diabetes |
| 1482                                              | 701,5         | 663,6                     | 751,7                     | 1634   | 110258,7     | P2          | 266642   | Diabetes |
| 1437,7                                            | 693,4         | 662,9                     | 730,2                     | 3103   | 215825,4     | P3          | 489196   | Diabetes |
| 1496,4                                            | 729           | 701,3                     | 760,8                     | 5162   | 344954       | P4          | 763224   | Diabetes |
| 1513,3                                            | 731,2         | 709                       | 756,2                     | 7417   | 490134,8     | P5          | 1059825  | Diabetes |
| 1549,2                                            | 743           | 723                       | 765,1                     | 9421   | 608118,6     | P6          | 1276934  | Diabetes |
| 1532,4                                            | 721,4         | 702,7                     | 741,9                     | 10354  | 675650,4     | P7          | 1408809  | Diabetes |
| 1503,3                                            | 703,5         | 685,4                     | 723,3                     | 11075  | 736722,5     | P8          | 1533857  | Diabetes |
| 1497,7                                            | 676,2         | 663,7                     | 689,8                     | 18350  | 1225246      | P9          | 2536505  | Diabetes |
| 1279,8                                            | 661,9         | 621,6                     | 710                       | 1258   | 98296        | P1          | 285246   | Control  |
| 1127,2                                            | 594,6         | 574,6                     | 616,9                     | 3915   | 347329,5     | P2          | 843936   | Control  |
| 1038,9                                            | 564,4         | 549,9                     | 580,1                     | 7055   | 679081       | P3          | 1543475  | Control  |
| 987,5                                             | 548,2         | 536,9                     | 560,3                     | 10883  | 1102054      | P4          | 2444784  | Control  |
| 948,1                                             | 544,1         | 534,3                     | 554,5                     | 15355  | 1619639      | P5          | 3508060  | Control  |
| 928,4                                             | 526,7         | 518,5                     | 535,4                     | 19493  | 2099669      | P6          | 4409042  | Control  |
| 933,5                                             | 522,8         | 514,8                     | 531,1                     | 22820  | 2444499      | P7          | 5091715  | Control  |
| 916,8                                             | 495,3         | 488,3                     | 502,6                     | 25661  | 2799107      | P8          | 5821763  | Control  |
| 926,2                                             | 477,8         | 472,8                     | 483                       | 46019  | 4968742      | P9          | 10265575 | Control  |
| <b>Sinus node disease, AV-block and pacemaker</b> |               |                           |                           |        |              |             |          |          |
| 224,7                                             | 103           | 79,4                      | 189,3                     | 69     | 30708        | P1          | 88315    | Diabetes |
| 174,1                                             | 77,5          | 66,6                      | 105,9                     | 195    | 111986,5     | P2          | 269485   | Diabetes |
| 204,4                                             | 89,8          | 81,3                      | 106,9                     | 451    | 220647,2     | P3          | 497854   | Diabetes |
| 211,9                                             | 91,9          | 85,2                      | 104                       | 752    | 354872,3     | P4          | 781494   | Diabetes |
| 225,1                                             | 101,2         | 93,6                      | 112,3                     | 1142   | 507236,4     | P5          | 1091967  | Diabetes |
| 249,3                                             | 114,1         | 106,4                     | 124,4                     | 1580   | 633687,6     | P6          | 1325871  | Diabetes |
| 264,1                                             | 118,8         | 111,5                     | 128,3                     | 1874   | 709597,4     | P7          | 1474639  | Diabetes |
| 265,8                                             | 113,1         | 106,3                     | 121,9                     | 2069   | 778508,7     | P8          | 1615553  | Diabetes |
| 279,6                                             | 118,7         | 112,9                     | 125,6                     | 3641   | 1302212      | P9          | 2687456  | Diabetes |
| 135,5                                             | 82,7          | 63,5                      | 112,1                     | 134    | 98893,8      | P1          | 285844   | Control  |
| 121,9                                             | 66,8          | 59                        | 77,3                      | 428    | 351205       | P2          | 850373   | Control  |
| 120,1                                             | 66,6          | 61,1                      | 73,5                      | 828    | 689531,4     | P3          | 1562257  | Control  |
| 118,2                                             | 64,7          | 60,9                      | 69,5                      | 1326   | 1122223      | P4          | 2482163  | Control  |
| 113,2                                             | 63,1          | 59,9                      | 67                        | 1872   | 1653942      | P5          | 3572375  | Control  |
| 124,1                                             | 69,6          | 66,6                      | 73,1                      | 2670   | 2151872      | P6          | 4508557  | Control  |
| 128,2                                             | 70,7          | 67,8                      | 74                        | 3227   | 2517540      | P7          | 5232265  | Control  |
| 131,2                                             | 70,3          | 67,5                      | 73,4                      | 3797   | 2894941      | P8          | 6007374  | Control  |
| 144,4                                             | 72,1          | 70,1                      | 74,2                      | 7456   | 5161962      | P9          | 10641236 | Control  |
| <b>Intraventricular conduction blocks</b>         |               |                           |                           |        |              |             |          |          |
| 48,8                                              | 22,5          | 12,2                      | 110,3                     | 15     | 30745,8      | P1          | 88359    | Diabetes |

|                                          |      |      |       |      |          |    |          |          |
|------------------------------------------|------|------|-------|------|----------|----|----------|----------|
| 50,8                                     | 23   | 17,2 | 50    | 57   | 112218,8 | P2 | 269873   | Diabetes |
| 56                                       | 26,4 | 21,6 | 41,6  | 124  | 221271,1 | P3 | 498956   | Diabetes |
| 58,7                                     | 27,6 | 23,6 | 38    | 209  | 356204,2 | P4 | 783963   | Diabetes |
| 73                                       | 40,6 | 33,3 | 51,7  | 372  | 509512   | P5 | 1096259  | Diabetes |
| 78                                       | 38,6 | 33,3 | 46,7  | 497  | 637260,2 | P6 | 1332647  | Diabetes |
| 84,5                                     | 44,6 | 39,2 | 52,6  | 604  | 714647,1 | P7 | 1484327  | Diabetes |
| 77,6                                     | 36,8 | 32,8 | 43,2  | 609  | 785110,7 | P8 | 1628368  | Diabetes |
| 82,1                                     | 37,2 | 34,3 | 41,5  | 1079 | 1314734  | P9 | 2712006  | Diabetes |
| 18,2                                     | 9,5  | 5,5  | 27,8  | 18   | 98954,3  | P1 | 285890   | Control  |
| 26,7                                     | 14,7 | 11,7 | 21,1  | 94   | 351671,8 | P2 | 851130   | Control  |
| 33,4                                     | 19,1 | 16,3 | 23,6  | 231  | 690708,9 | P3 | 1564371  | Control  |
| 34,8                                     | 20,2 | 17,8 | 23,7  | 391  | 1124587  | P4 | 2486536  | Control  |
| 40,9                                     | 23,4 | 21,5 | 25,9  | 678  | 1657844  | P5 | 3579781  | Control  |
| 45                                       | 27,9 | 25,5 | 30,8  | 970  | 2157816  | P6 | 4519926  | Control  |
| 48,3                                     | 27,1 | 25,2 | 29,3  | 1220 | 2525995  | P7 | 5248546  | Control  |
| 46,8                                     | 26   | 24,3 | 28,1  | 1361 | 2906137  | P8 | 6029041  | Control  |
| 48,2                                     | 25,8 | 24,4 | 27,3  | 2500 | 5185486  | P9 | 10686727 | Control  |
| Ventricular tachycardia and fibrillation |      |      |       |      |          |    |          |          |
| 81,3                                     | 47,5 | 27,9 | 136,1 | 25   | 30740,3  | P1 | 88355    | Diabetes |
| 61,5                                     | 32,2 | 24   | 60,1  | 69   | 112208,5 | P2 | 269854   | Diabetes |
| 58,7                                     | 35,3 | 26,2 | 53,9  | 130  | 221277,6 | P3 | 498960   | Diabetes |
| 62,3                                     | 32,6 | 27,8 | 43,7  | 222  | 356216,8 | P4 | 783966   | Diabetes |
| 61,2                                     | 31,9 | 26,9 | 40,8  | 312  | 509652,9 | P5 | 1096491  | Diabetes |
| 71,4                                     | 39,5 | 33,5 | 48,4  | 455  | 637517,9 | P6 | 1333134  | Diabetes |
| 69,5                                     | 41,1 | 34,3 | 50,7  | 497  | 715124   | P7 | 1485247  | Diabetes |
| 71,5                                     | 36,8 | 32   | 44    | 562  | 785744,5 | P8 | 1629630  | Diabetes |
| 68,3                                     | 42,4 | 36,4 | 50    | 899  | 1315909  | P9 | 2714325  | Diabetes |
| 59,6                                     | 31,4 | 23,8 | 50,7  | 59   | 98936,6  | P1 | 285869   | Control  |
| 58,3                                     | 40,4 | 32,8 | 51,2  | 205  | 351579,7 | P2 | 850988   | Control  |
| 48,1                                     | 29,5 | 25,5 | 35,2  | 332  | 690563,3 | P3 | 1564084  | Control  |
| 41,4                                     | 24,9 | 22,3 | 28,5  | 466  | 1124461  | P4 | 2486269  | Control  |
| 42                                       | 27,4 | 24,5 | 31    | 696  | 1657794  | P5 | 3579621  | Control  |
| 41,3                                     | 25,1 | 23   | 27,7  | 892  | 2158036  | P6 | 4520292  | Control  |
| 41,2                                     | 25   | 23   | 27,5  | 1042 | 2526660  | P7 | 5249734  | Control  |
| 40                                       | 24,7 | 22,5 | 27,2  | 1162 | 2907226  | P8 | 6031100  | Control  |
| 40,2                                     | 23,3 | 21,9 | 25    | 2085 | 5187907  | P9 | 10691372 | Control  |



**Table S3. Crude- and standardized incidence rates for atrial fibrillation/flutter according to age-categories, in patients with type 2 diabetes and matched controls for all time-periods.**

| Crude rate | Adjusted rate | Lower confidence interval | Upper confidence interval | Events | Person-years | Time-period | n       | Category | Age-groups |
|------------|---------------|---------------------------|---------------------------|--------|--------------|-------------|---------|----------|------------|
| 157,3      | 108,1         | 42,2                      | 426,4                     | 3      | 1907,3       | P1          | 4868    | Diabetes | (18-44)    |
| 15,3       | 11,3          | 1,6                       | 82,5                      | 1      | 6541,7       | P2          | 14674   | Diabetes | (18-44)    |
| 77,1       | 94,2          | 57,7                      | 150,1                     | 10     | 12965,9      | P3          | 28030   | Diabetes | (18-44)    |
| 97,5       | 103,9         | 75,7                      | 141,2                     | 21     | 21541,3      | P4          | 46099   | Diabetes | (18-44)    |
| 117,1      | 135,3         | 108,9                     | 167,1                     | 39     | 33306,4      | P5          | 70205   | Diabetes | (18-44)    |
| 118        | 81,2          | 65,6                      | 682,5                     | 54     | 45749,5      | P6          | 94304   | Diabetes | (18-44)    |
| 119,8      | 163,9         | 81,3                      | 331,4                     | 67     | 55911,7      | P7          | 114500  | Diabetes | (18-44)    |
| 137,2      | 160,1         | 116,6                     | 229,7                     | 91     | 66318,9      | P8          | 135616  | Diabetes | (18-44)    |
| 145,8      | 219,2         | 185                       | 260,5                     | 175    | 120051       | P9          | 243637  | Diabetes | (18-44)    |
| 56         | 68,5          | 26,4                      | 167,4                     | 5      | 8936,4       | P1          | 22775   | Control  | (18-44)    |
| 51,6       | 84,7          | 57,3                      | 123                       | 16     | 30983,2      | P2          | 69512   | Control  | (18-44)    |
| 40,5       | 49,6          | 36,7                      | 66,4                      | 25     | 61742,3      | P3          | 133517  | Control  | (18-44)    |
| 57,1       | 72,8          | 60,9                      | 86,7                      | 59     | 103322,3     | P4          | 221279  | Control  | (18-44)    |
| 65,7       | 76,5          | 67,2                      | 86,9                      | 106    | 161325,6     | P5          | 340215  | Control  | (18-44)    |
| 57,5       | 204,8         | 107,9                     | 386,6                     | 129    | 224341,6     | P6          | 462741  | Control  | (18-44)    |
| 68,8       | 113,1         | 84,8                      | 154,9                     | 191    | 277460,8     | P7          | 568512  | Control  | (18-44)    |
| 78,7       | 110,4         | 93,1                      | 132,5                     | 262    | 332887,7     | P8          | 680943  | Control  | (18-44)    |
| 89         | 119,3         | 108,7                     | 131,2                     | 545    | 612514,9     | P9          | 1243365 | Control  | (18-44)    |
| 511,4      | 495,9         | 341,3                     | 747,8                     | 62     | 12123,1      | P1          | 34048   | Diabetes | (45-64)    |
| 562,9      | 599,1         | 515,8                     | 697,2                     | 257    | 45657,7      | P2          | 108387  | Diabetes | (45-64)    |
| 612,8      | 586,2         | 537,8                     | 639,6                     | 571    | 93181,3      | P3          | 208031  | Diabetes | (45-64)    |
| 635,3      | 593,6         | 557,3                     | 632,4                     | 977    | 153781,5     | P4          | 335094  | Diabetes | (45-64)    |
| 712,6      | 646,6         | 616,6                     | 678,2                     | 1602   | 224794,8     | P5          | 479420  | Diabetes | (45-64)    |
| 757,8      | 844,1         | 673,9                     | 1074,4                    | 2170   | 286347,4     | P6          | 594777  | Diabetes | (45-64)    |
| 805,4      | 842,7         | 766,7                     | 927,9                     | 2650   | 329036,8     | P7          | 679138  | Diabetes | (45-64)    |
| 859,2      | 794,8         | 749,5                     | 843,2                     | 3174   | 369410,6     | P8          | 761446  | Diabetes | (45-64)    |
| 912,6      | 810,8         | 784                       | 838,5                     | 5847   | 640662,5     | P9          | 1320860 | Diabetes | (45-64)    |
| 353,9      | 485,9         | 390,5                     | 607,5                     | 148    | 41822,7      | P1          | 117590  | Control  | (45-64)    |
| 340,3      | 376,3         | 341,4                     | 415,2                     | 536    | 157501,7     | P2          | 375803  | Control  | (45-64)    |
| 339,2      | 366,4         | 345,1                     | 389                       | 1111   | 327498,8     | P3          | 735047  | Control  | (45-64)    |
| 363,7      | 361,8         | 346,9                     | 377,4                     | 2025   | 556822,5     | P4          | 1219693 | Control  | (45-64)    |
| 379,1      | 377,3         | 365,6                     | 389,5                     | 3203   | 844865,5     | P5          | 1810142 | Control  | (45-64)    |
| 412,7      | 519,8         | 436,3                     | 620,9                     | 4613   | 1117686      | P6          | 2327201 | Control  | (45-64)    |
| 458        | 496,5         | 464,2                     | 531,2                     | 6080   | 1327523      | P7          | 2743826 | Control  | (45-64)    |
| 487,1      | 488,1         | 468,7                     | 508,5                     | 7512   | 1542327      | P8          | 3182778 | Control  | (45-64)    |
| 555,7      | 528,7         | 517,7                     | 539,8                     | 15523  | 2793396      | P9          | 5759055 | Control  | (45-64)    |
| 2291,5     | 2515,6        | 2336,1                    | 2707,3                    | 343    | 14968,2      | P1          | 44494   | Diabetes | (65-84)    |
| 2251,7     | 2338,9        | 2248,5                    | 2432,6                    | 1205   | 53515,6      | P2          | 131631  | Diabetes | (65-84)    |
| 2105,8     | 2167          | 2104,1                    | 2231,6                    | 2152   | 102191,6     | P3          | 234664  | Diabetes | (65-84)    |
| 2307       | 2332,8        | 2280,7                    | 2386                      | 3666   | 158909,6     | P4          | 355907  | Diabetes | (65-84)    |
| 2315,7     | 2275,3        | 2231,7                    | 2319,8                    | 5040   | 217645       | P5          | 475622  | Diabetes | (65-84)    |

|        |        |        |        |       |          |    |         |          |         |
|--------|--------|--------|--------|-------|----------|----|---------|----------|---------|
| 2441,3 | 2366,5 | 2325,9 | 2407,9 | 6357  | 260393,1 | P6 | 552345  | Diabetes | (65-84) |
| 2508,4 | 2352,2 | 2313   | 2392,2 | 6949  | 277026,1 | P7 | 584227  | Diabetes | (65-84) |
| 2501,3 | 2284   | 2246   | 2322,7 | 7229  | 289006,1 | P8 | 609543  | Diabetes | (65-84) |
| 2565,7 | 2292,2 | 2261   | 2323,8 | 11526 | 449239,8 | P9 | 937712  | Diabetes | (65-84) |
| 2133,9 | 2308,3 | 2202,6 | 2418,5 | 920   | 43113,9  | P1 | 130503  | Control  | (65-84) |
| 1929,7 | 2056,3 | 2002   | 2112   | 2820  | 146137,8 | P2 | 364748  | Control  | (65-84) |
| 1880,9 | 1999,5 | 1959,8 | 2039,9 | 5084  | 270297,5 | P3 | 626232  | Control  | (65-84) |
| 1849,8 | 1955,4 | 1923,6 | 1987,6 | 7690  | 415719,9 | P4 | 939116  | Control  | (65-84) |
| 1820,7 | 1930,7 | 1903,8 | 1957,9 | 10547 | 579282,4 | P5 | 1274973 | Control  | (65-84) |
| 1810,1 | 1903,8 | 1879,9 | 1928   | 13036 | 720183,8 | P6 | 1533842 | Control  | (65-84) |
| 1867,2 | 1875,7 | 1853,6 | 1898,2 | 15052 | 806125,1 | P7 | 1703707 | Control  | (65-84) |
| 1849,5 | 1830,7 | 1810   | 1851,6 | 16532 | 893864,6 | P8 | 1889754 | Control  | (65-84) |
| 1852,1 | 1761,6 | 1746,2 | 1777,2 | 28189 | 1522022  | P9 | 3171783 | Control  | (65-84) |
| 4065,6 | 4165,5 | 3639,6 | 4768,4 | 60    | 1475,8   | P1 | 4674    | Diabetes | (>85)   |
| 3763,4 | 3881,9 | 3587,3 | 4201,1 | 171   | 4543,7   | P2 | 11950   | Diabetes | (>85)   |
| 4942,2 | 5009,5 | 4749,6 | 5284   | 370   | 7486,6   | P3 | 18471   | Diabetes | (>85)   |
| 4644,8 | 4793,9 | 4579,5 | 5018,5 | 498   | 10721,7  | P4 | 26124   | Diabetes | (>85)   |
| 5115,2 | 5354,8 | 5156,9 | 5560,3 | 736   | 14388,6  | P5 | 34578   | Diabetes | (>85)   |
| 5374,7 | 5543,9 | 5350,5 | 5744,5 | 840   | 15628,7  | P6 | 35508   | Diabetes | (>85)   |
| 5030,8 | 5210,7 | 5009,2 | 5420,6 | 688   | 13675,8  | P7 | 30944   | Diabetes | (>85)   |
| 4846,9 | 4929,3 | 4722,9 | 5144,9 | 581   | 11987    | P8 | 27252   | Diabetes | (>85)   |
| 5244,3 | 5403,7 | 5211,4 | 5603,3 | 802   | 15292,9  | P9 | 34296   | Diabetes | (>85)   |
| 4182,7 | 4473,2 | 4135,6 | 4839,2 | 185   | 4423     | P1 | 14378   | Control  | (>85)   |
| 4273,3 | 4423   | 4226   | 4629,6 | 543   | 12706,8  | P2 | 33873   | Control  | (>85)   |
| 4272,8 | 4525,9 | 4362   | 4696,1 | 835   | 19542,4  | P3 | 48679   | Control  | (>85)   |
| 4234,6 | 4453,3 | 4312,6 | 4598,9 | 1109  | 26189,1  | P4 | 64696   | Control  | (>85)   |
| 4387,5 | 4762,3 | 4631,3 | 4897,2 | 1499  | 34165,4  | P5 | 82730   | Control  | (>85)   |
| 4578,5 | 4880,5 | 4753,3 | 5011,3 | 1715  | 37457,8  | P6 | 85258   | Control  | (>85)   |
| 4483,3 | 4858,8 | 4722   | 4999,8 | 1497  | 33390,3  | P7 | 75670   | Control  | (>85)   |
| 4512,5 | 4782,5 | 4640,4 | 4929,3 | 1355  | 30027,7  | P8 | 68288   | Control  | (>85)   |
| 4317,6 | 4674,8 | 4553,3 | 4799,8 | 1762  | 40809,4  | P9 | 91372   | Control  | (>85)   |

**Table S4 Variables Used in the Imputation Algorithm.**

Age, sex, age at onset of diabetes, clinicians diagnosis type, epidemiological definition of diabetes, treatment of diabetes, method of insulin treatment, systolic blood pressure, diastolic blood pressure, body weight, body length, glyated hemoglobin (HbA1c), total cholesterol, triglycerides, HDL-cholesterol, LDL-cholesterol, albuminuria, s-creatinine, retinopathy, smoking status, physical activity, county, body mass index, marital status, education, ethnicity, income, family income, eGFR, history of acute myocardial infarction, coronary heart disease, heart failure, hypertension, peripheral arterial disease, chronic obstructive pulmonary disease, dementia, alcoholism, end-stage renal disease, cancer, stroke, treatment with anti-hypertensive medication, statins, antithrombotic and anti-coagulant medication.
